# Supplementary material
Source: HighWire-hosted journal article supplement (https://jnm.snmjournals.org/highwire/filestream/95072/field_highwire_adjunct_files/0/180463_Supplemental_Data.pdf)
Supplement: 180463_Supplemental_Data.pdf [file 180463_Supplemental_Data.pdf]

## Supplemental Figure 1

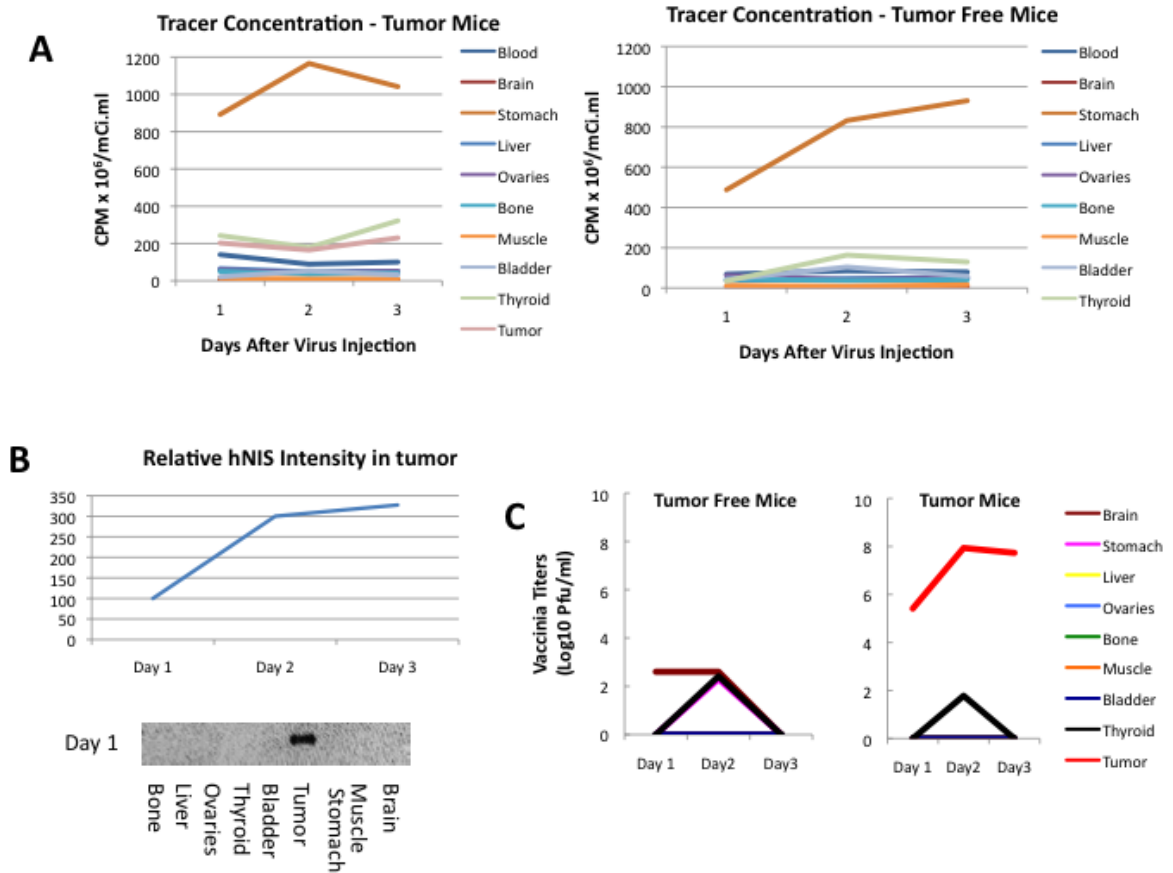

HT29 tumors were established or not in nude mice by injecting  $1 \times 10^6$  cells in sub-cutaneous.

Tumors were then injected with VVhNIS. 1, 2 or 3 days after virus treatment, mice were

injected with  $^{99}\text{Tc}$  radioisotope. 2 Mice were bearing tumor and 2 with free tumor were then

sacrificed, normal organs and tumor (when present) were harvested to **A.** directly measure the

concentration of tracer in each tissues; **B.** quantify hNIS expression by western blot after

membrane extraction and **C.** titer of vaccinia virus by plaque assay after homogenization of the

tissues.
